# Supplementary material for: Rehabilitation von jungen Erwachsenen mit Krebs
Source: Springer Nature journal article supplement (doi:10.1007/s41906-022-1320-y), 2022-07-01
Supplement: MOESM1 [file 23270828]

## Literatur

### zum Beitrag „Rehabilitation von jungen Erwachsenen mit Krebs“

von Anika Biel

*PflegeZeitschrift* (75) 8/2022, S. 32-34

Barsky Reese J et al. Patient-provider communication about sexual concerns in cancer: a systematic review. *J Cancer Surviv.* 2017;11(2):175-88

Bleyer A et al. (2008) The distinctive biology of cancer in adolescents and young adults. *Nat Rev Cancer.* 2008;8(4):288-98

Coccia PF et al. (2012) Adolescents and young adult oncology. Clinical practice guidelines in oncology. *J Natl Compr Canc Netw.* 2012;10(9):1112-50

Deutsches Krebsforschungszentrum (DKFZ) (2013) [www.dkfz.de/pressemitteilungen](http://www.dkfz.de/pressemitteilungen) Nr.07/ 2013

Deutsche Rentenversicherung (DRV) (2021) Rehabericht 2021. Die medizinische und berufliche Rehabilitation der Rentenversicherung im Licht der Statistik, S.6 und S.24

Gesellschaft der epidemiologischen Krebsregister in Deutschland e.V. Atlas der Krebsinzidenz und –mortalität in Deutschland (GEKID-Atlas). Datenlieferung: Dezember 2011, Lübeck, 2013; <http://www.gekid.de> -> Barsky Reese J et al. Patient-provider communication about sexual concerns in cancer: a systematic review. *J Cancer Surviv.* 2017;11(2):175-88

Gesellschaft der epidemiologischen Krebsregister in Deutschland e.V. Atlas der Krebsinzidenz und –mortalität in Deutschland (GEKID-Atlas). Datenlieferung: Dezember 2011, Lübeck, 2013; <http://atlas.gekid.de/CurrentVersion/atlas.html>

Harrison et al. Cytogenetics of pediatric and adolescents acute lymphoblastic leukemia. *Br J Hematol.* 2009;144:(2)147-56

Hughes N, Stark D. The management of adolescents and young adults with cancer. *Cancer Treat Rev.* 2018;67:45-53

Mucci AL et al. Familial risk and heritability of cancer among twins in nordic countries. *JAMA.* 2016;315(1): 68-76

Morgan S et al. Sex, drugs and rock'n roll: caring for adolescents and young adults with cancer. *J Clin Oncol.* 2010;28(32):4825-30

Moreira ED Jr et al. Help-seeking behaviour for sexual problems: the Global Study of Sexual Attitudes and Behaviors. *Int J Clin Pract.* 2005; 59(1):6-16

Pearce S. Policy and practice in teenage and young adult cancer care in England: looking to the future. *Eur J Oncol Nurs.* 2009;13(3):149-53

Sender L, Zabokrtsky KB (2015) Adolescent and young adult patients with cancer: A milieu of unique features. *Nat Rev Clin Oncol.* 2015;12(8):465-80

Tricoli JV et al. Unique characteristics of adolescent and young adult acute lymphoblastic leukemia, breast cancer, and colon cancer. *J. Natl Cancer Inst.* 2011;103(8):628-35

World Health Organisation. Defining sexual health. Report of a technical consultation on sexual health, 28–31 January 2002. WHO, Genf; 2006
